# Supplementary material for: Health Service Access among Indonesian Migrant Domestic Workers in Taiwan
Source: MDPI journal article supplement (doi:10.3390/ijerph18073759), 2021-04-04
Supplement: s1 [file s1]

## Supplementary Materials

**Table S1.** Distribution score of 5 domain access to health services.

|               | N   | Minimum | Maximum | Mean    |
|---------------|-----|---------|---------|---------|
| Availability  | 248 | 5.00    | 25.00   | 14.5927 |
| Accessibility | 248 | 8.00    | 20.00   | 16.0847 |
| Accommodation | 248 | 7.00    | 25.00   | 18.5524 |
| Affordability | 248 | 10.00   | 25.00   | 19.3710 |
| Acceptability | 248 | 9.00    | 25.00   | 20.5444 |

**Table S2.** Descriptive statistic for availability (n = 248).

| No | Availability                                                                      | Strongly Disagree | Disagree | Neutral | Agree | Strongly Agree |
|----|-----------------------------------------------------------------------------------|-------------------|----------|---------|-------|----------------|
| 1  | Health facilities offer health promotion, prevention, and rehabilitation services | 2.0%              | 14.9%    | 12.1%   | 53.2  | 17.7%          |
| 2  | Health facilities offer specialist services (e.g., neurologist)                   | 2.0%              | 8.1 %    | 12.9%   | 58.9% | 18.1%          |
| 3  | Health services are available in Indonesian                                       | 25.8%             | 41.9%    | 5.6%    | 17.3% | 9.3%           |
| 4  | Some doctors speak Indonesia                                                      | 28.6%             | 41.9%    | 7.3%    | 12.9% | 9.3%           |
| 5  | Translators are available during checkups and hospital visits                     | 29.4%             | 39.9%    | 7.3%    | 16.1% | 7.3%           |

**Table S3.** Descriptive statistic for accessibility (n = 248).

| No | Accessibility                                                         | Strongly Disagree | Disagree | Neutral | Agree | Strongly Agree |
|----|-----------------------------------------------------------------------|-------------------|----------|---------|-------|----------------|
| 1  | It is easy to travel to health facilities.                            | 0.8%              | 2.0%     | 3.2%    | 61.7% | 32.3%          |
| 2  | I do not have problems of being unable to pay for the cost of travel. | 1.2%              | 7.3%     | 15.7%   | 58.1% | 17.7%          |
| 3  | Distance from residence to hospital is not too far                    | 0%                | 3.6%     | 7.3%    | 69.8% | 19.4%          |
| 4  | Emergency van is always available upon request for serious condition. | 0.8%              | 6.5%     | 12.1%   | 56%   | 24%            |

**Table S4.** Descriptive statistic for accommodation (n = 248).

| No | Accommodation                                                             | Strongly Disagree | Disagree | Neutral | Agree | Strongly Agree |
|----|---------------------------------------------------------------------------|-------------------|----------|---------|-------|----------------|
| 1  | I have ever received expedited services during my visits to the hospital. | 3.6%              | 21.4%    | 15.7%   | 33.1% | 26.2%          |
| 2  | I have received help from volunteers at the hospital                      | 1.2%              | 23.8%    | 14.5%   | 41.5% | 19%            |
| 3  | I feel comfortable receiving health services.                             | 0%                | 4.4%     | 11.7%   | 62%   | 21.8%          |
| 4  | I received health service guidelines.                                     | 0.4%              | 19 %     | 12.1%   | 47.6% | 21%            |
| 5  | The guideline is easy to understand.                                      | 0.4%              | 16.5%    | 15.7%   | 43.1% | 24.2%          |

Table S5. Descriptive statistic for affordability.

| No | Affordability                                                                         | Strongly Disagree | Disagree | Neutral | Agree | Strongly Agree |
|----|---------------------------------------------------------------------------------------|-------------------|----------|---------|-------|----------------|
| 1  | I had no difficulties getting national health insurance.                              | 0.4%              | 2.4%     | 8.9%    | 58.5% | 29.8%          |
| 2  | I had to pay out of pocket in addition to the regular copayment and registration fee. | 1.6%              | 12.5%    | 15.3%   | 53.2% | 17.3%          |
| 3  | I have enough money to pay out of pocket.                                             | 3.2%              | 10.1%    | 21.8%   | 41.1% | 23.8%          |
| 4  | The service charge is affordable for me.                                              | 1.2%              | 2.8%     | 10.5%   | 53.6% | 31.9%          |
| 5  | I feel comfortable to pay extra for medicine/health services if needed.               | 6.5%              | 7.7%     | 16.5%   | 52.4% | 16.9%          |

Table S6. Descriptive statistic for acceptability.

| No | Acceptability                                                   | Strongly Disagree | Disagree | Neutral | Agree | Strongly Agree |
|----|-----------------------------------------------------------------|-------------------|----------|---------|-------|----------------|
| 1  | When visiting a health facility, the health workers respect me. | 1.2%              | 1.2%     | 8.1%    | 59.3% | 30.2%          |
| 2  | The health workers pay attention to my needs.                   | 0%                | 3.2%     | 8.5%    | 61.3% | 27%            |
| 3  | The physician visits me thoroughly.                             | 0.4%              | 4.4%     | 12.1%   | 5.2%  | 27.8%          |
| 4  | I have trust in health workers.                                 | 0%                | 4.0 %    | 12.1%   | 59.7% | 24.2%          |
| 5  | I feel like receive equal health services to locals.            | 0%                | 0.8%     | 11.3%   | 58.5% | 29.4%          |
